1 **Cervical Squamous Intraepithelial Lesions are Associated with Changes in the Vaginal**  
2 **Microbiota of Mexican Women**

3

4 Nieves-Ramírez ME<sup>1,2,3</sup>, Partida-Rodríguez O<sup>1,2</sup>, Moran P<sup>2</sup>, Serrano-Vázquez A<sup>2</sup>, Pérez-Juárez  
5 H<sup>2</sup>, Pérez-Rodríguez ME<sup>3</sup> Arrieta MC<sup>4\*</sup>, Ximénez-García C<sup>2\*</sup> and Finlay BB<sup>1,5\*</sup>.

6

7 1 Michael Smith Laboratories, Department of Microbiology and Immunology, University of  
8 British Columbia, Vancouver, British Columbia, Canada

9 2 Laboratorio de Inmunología, Unidad de Investigación de Medicina Experimental, Facultad de  
10 Medicina, Universidad Nacional Autónoma de México

11 3 Depts. of Physiology and Pharmacology & Pediatrics. Cumming School of Medicine,  
12 Cumming School of Medicine, University of Calgary, Alberta Canada

13 4 Laboratorio de Inmunología, UAEM Pediatría del Centro Médico Nacional SXXI, Instituto  
14 Mexicano del Seguro Social

15 5 Departments of Microbiology and Immunology, and Biochemistry and Molecular Biology,  
16 University of British Columbia, Vancouver, British Columbia, Canada. bfinlay@mail.ubc.ca

17

18 Corresponding authors\*

19

## 20 **ABSTRACT**

21 Cervical cancer is an important health concern worldwide and is one of the leading causes of  
22 deaths in Mexican women. Previous studies have shown changes in the female genital tract  
23 microbe community related to Human Papillomavirus (HPV) infection and cervical cancer, yet  
24 this link remains unexplored in many human populations. This study evaluated the vaginal  
25 bacterial community among Mexican women with pre-cancerous Squamous Intraepithelial  
26 Lesions (SIL). We sequenced the V3 region of the 16S rRNA gene (Illumina Miseq) in cervical  
27 samples from 300 Mexican women, including 157 patients with SIL, most of which were HPV  
28 positive, and 143 healthy women without HPV infection or SIL. Beta-diversity analysis showed  
29 that 14.6% of the variance in vaginal bacterial community structure is related to the presence of  
30 SIL. Presence of SIL was also associated with a higher species richness (Chao 1). MaAsLiN  
31 analysis yielded independent associations between SIL/HPV status and an increase in the relative  
32 abundance *Brachy bacterium conglomeratum*, as well as a decrease in *Sphingobium yanoikuyae*  
33 and *Lactobacillus* spp. We also identified independent associations between HPV-16, the most  
34 common HPV subtype linked to SIL, and *Brachy bacterium conglomeratum*. Our work indicates  
35 that the presence of SIL and HPV infection is associated with important changes in the vaginal  
36 microbiome, some of which may be specific to this human population.

## 37 **IMPORTANCE**

38 HPV plays a critical role in cervical carcinogenesis but is not sufficient for cervical cancer  
39 development, indicating involvement of other factors. Vaginal microbiota is an important factor  
40 in controlling infections caused by HPV and depending on its composition it can modulate the  
41 microenvironment in vaginal mucosa against viral infection. Ethnic and sociodemographic  
42 factors influence differences in vaginal microbiome composition, which underlies the dysbiotic

43 patterns linked to HPV infection and cervical cancer across different women populations. Here,  
44 we provide evidence for associations between vaginal microbiota patterns and HPV infection,  
45 linked to ethnic and sociodemographic factor. To our knowledge, this is the first report of  
46 *Brevibacterium aureum* and *Brachybacterium conglomeratum* species linked to HPV infection or  
47 SIL.

48

## 49 INTRODUCTION

50 Cervical cancer is one of the most common cancers and one of the leading causes of deaths in  
51 women worldwide (1, 2). Cervical cancer is causally related with Human Papillomavirus (HPV)  
52 infection, an oncogenic virus actively involved in cervical epithelium transformation (3, 4). After  
53 HPV infection and persistency, squamous intraepithelial lesions (SIL) development may occur,  
54 which may heal or persist and evolve to cancer (1). Despite overwhelming evidence that certain  
55 subtypes of HPV are the main causative agents of SIL development and progression to cervical  
56 cancer, it is also well-established that HPV alone is not sufficient to induce cervical malignant  
57 transformation (4–7). Many factors have been associated with the appearance SIL such as,  
58 intermenstrual bleeding, multiparity, use of contraceptives, multiple sexual partners, and  
59 smoking (8).

60 In addition to these variables, it has been proposed that the vaginal microbiota plays an important  
61 role in the development of HPV infection leading to cervical neoplasm (9). This is aligned with  
62 the endorsed concept in infection biology, in which successful pathogen colonization and  
63 infection embodies dynamic interactions between the infecting microbes, host factors and the  
64 microbiome (10). The vaginal microbiota is a complex microbial ecosystem influenced by

65 environmental and host factors, as well as ethnic background (11). The vaginal microbiota in  
66 healthy women consists of over 200 bacterial species, but this ecosystem is generally dominated  
67 by *Lactobacillus* spp. Lactobacilli provide broad spectrum protection by producing lactic acid,  
68 bacteriocins and biosurfactants, and by adhering to the mucosa that forms barriers against  
69 pathogenic infections in the vaginal microenvironment (2, 12). Upon imbalance of this defense  
70 system, physicochemical changes arise, inducing histological alterations of the vaginal mucosa  
71 and the cervical epithelium, all of which put a selective pressure on the microbiota (13–15).

72 Some vaginal microorganisms, such as *Gardnerella*, *Fusobacteria*, *Bacillus cohnii*, *Dialister*,  
73 *Prevotella* and *Mycoplasma*, as well as a decrease in the proportion of *Lactobacillus* spp., have  
74 been linked to dysbiosis that would generate an unstable microenvironment, which in turn could  
75 enable the effect of key risk factors in cervical cancer (16–19). Some of these changes are  
76 responsible for increasing the levels of mucin-degrading enzymes, which may play a role in the  
77 degradation of the mucous layer that covers the vaginal and cervical epithelium and endocervical  
78 mucus (20, 21). There is evidence of HPV evasion or infection mechanisms that support that  
79 microorganisms such as *Sneathia*, *Anaerococcus*, *Fusobacterium* and *Gardnerella* are implicated  
80 with higher frequency and severity of disease, potentially resulting in pre-cancerous and  
81 cancerous cervical lesions (22)

82 However, these findings are not uniform across studied populations, because, despite the fact that  
83 Latin American countries have a high prevalence of HPV and cervical cancer are one of the main  
84 causes of death in women in these areas (3, 23–25), including Mexico (7, 9), most of the studies  
85 have been conducted in developed countries (26). Likewise, the projected demographic changes  
86 in Latin America imply that the current burden of new cervical cancer cases will increase in the  
87 next 20 years (2, 27). The evidence observed so far suggests that the ethnic and

88 sociodemographic factors that influence difference in vaginal microbiome composition may also  
89 underlie dysbiotic patterns linked to HPV infection and cervical cancer across different Latin  
90 America women populations (3, 7, 9, 23–25). Therefore, there is a growing need for more  
91 evidence in Latin America to demonstrate the association between vaginal microbiota patterns  
92 and HPV infection and its relationship with the progression of SIL to cervical cancer.

93 Very little is known about vaginal microbiome differences linked to HPV infection and cervical  
94 cancer risk in Latin American women. In this work, we compared the vaginal microbiota in 300  
95 Mexican women with precancerous SIL to healthy controls, while taking into consideration the  
96 confounding effect of clinical, behavioral and HPV infection-related variables, and its  
97 association with the above-mentioned categorical variables and the condition of HVP infection  
98 considering the type of premalignant lesion of cervix and the genetic variants of the virus.

99

## 100 **MATERIAL AND METHODS**

### 101 **Study design**

102 Healthy women and women infected with HPV regardless of the degree of cervical squamous  
103 lesion, over 25 years of age, attending the Instituto Mexicano del Seguro Social (IMSS) in  
104 Mexico City were invited to participate as volunteers in this study. Written informed consent was  
105 obtained from all volunteers after providing them with detailed information about the study and  
106 its characteristics. The clinical research protocol and letter of informed consent were evaluated  
107 and approved by the Comité Local de Investigación y de Bioética de la División de Educación e  
108 Investigación Médica de la Unidad de Alta Especialidad Médica Pediatría del Instituto Mexicano  
109 del Seguro Social (IMSS). All participants completed a study questionnaire that was used to

110 obtain the sociodemographic and risk factor information. Data were registered in a secured  
111 database for subsequent statistical analysis.

112 A total of 300 Mexican women over 25 years old who attended the IMSS from December 2003  
113 to July 2006 were included in this study. These women were divided in two groups: a healthy  
114 control group of 143 women with a mean age of 42 years ( $\pm 0.65$ ) with three previous  
115 Papanicolaou (Pap) tests negative for HPV infection for three consecutive years (a fourth  
116 negative Pap result occurred at the time participants were invited to join the study), and  
117 diagnosed without SIL, with normal cytology and colposcopy results by the treating  
118 gynecologist. The second group (cases) consist of 157 patients with a mean age of 36 years ( $\pm$   
119 0.89) with different degrees of SIL and result positive for HPV infection based on cytology,  
120 histology, and colposcopy examination. This group included women diagnosed with cervical  
121 intraepithelial neoplasia from 1 to 3 (CIN1, CIN2 and CIN3) according to the Bethesda  
122 classification (28). Participants who had received treatment for vaginal or urinary infections  
123 currently, who were pregnant or up to 2 months postpartum, with a history of hysterectomy, or  
124 with a severe chronic disease were excluded from the study.

### 125 **Samples of vaginal exudate**

126 Samples of vaginal exudate were taken by swabbing the mucosa using sterile Teflon swabs that  
127 were placed in a sterile 15 ml conical plastic tube with sterile 0.9 % sodium chloride (Baxter  
128 physiological saline solution), the sample was kept at  $-20\text{ }^{\circ}\text{C}$  until its use for microbiome  
129 sequencing analysis.

### 130 **Cervical DNA extraction and HPV detection and typing**

131 Cervical DNA was extracted directly from a cervical brushing of each patient. The sample was  
132 placed in 1 ml of saline solution at 4 ° C for transport and immediately processed for DNA  
133 extraction. DNA was obtained using the proteinase K-SDS lysis technique (29) and was frozen at  
134 -20 ° C until use. HPV was detected via PCR, using two sets of oligonucleotides MY09 / MY11  
135 (30) and GP5 / GP6 (31). Cycling conditions were used as previously described for the detection  
136 of HPV DNA in cervical cells (30–32). HPV DNA obtained from HeLa cell cultures containing  
137 10 to 50 copies of the HPV-18 ORF L1 was used as a positive control (33). All positive samples  
138 for HPV were subsequently typed with the HPVFast 2.0 kit (Pharma Gen SA, Madrid, Spain)  
139 according to the manufacturer's instructions.

#### 140 **16S mRNA gene Sequencing**

141 From vaginal DNA samples, the 16S rRNA gene was amplified by PCR in triplicate using bar-  
142 coded primer pairs flanking the V3 region as previously described (34). Each 50 µl of PCR  
143 mixture contained 22 µl of water, 25 µl of TopTaq master mix, 0.5 µl of each forward and  
144 reverse bar-coded primer, and 2 µl of template DNA. The PCR program consisted of an initial  
145 DNA denaturation step at 95°C (5 min), 25 cycles of DNA denaturation at 95°C (1 min), an  
146 annealing step at 50°C (1 min), an elongation step at 72°C (1 min), and a final elongation step at  
147 72°C (7min). Controls without template DNA were included to ensure that no contamination  
148 occurred. Amplicons were run on a 2% agarose gel to ensure adequate amplification. Amplicons  
149 displaying bands at ~160 pb were purified using the illustra GFX PCR DNA purification kit.  
150 Purified samples were diluted 1:50 and quantified using PicoGreen (Invitrogen) in the Tecan  
151 M200 plate reader (excitation at 480 nm and emission at 520 nm).

152 For 16S rRNA gene sequencing, each PCR pool was analyzed on the Agilent Bioanalyzer using  
153 the high-sensitivity double-stranded DNA (dsDNA) assay to determine approximate library

154 fragment size and verify library integrity. Pooled-library concentrations were determined using  
155 the TruSeq DNA sample preparation kit, version 2 (Illumina). Library pools were diluted to 4  
156 nM and denatured into single strands using fresh 0.2 N NaOH. The final library loading  
157 concentration was 8 pM, with an additional PhiX spike-in of 20 %. Sequencing was carried out  
158 using a Hi-Seq 2000 bidirectional Illumina sequencing and cluster kit, version 4 (Macrogen,  
159 Inc.). PCR products were visualized on E-gels, quantified using Invitrogen Qubit with  
160 PicoGreen, and pooled at equal concentrations, according to a previous report (35).

### 161 **Bioinformatic analysis of 16S rRNA gene sequences**

162 All sequences were processed using Mothur according to the standard operating procedure as  
163 previously described (36). Quality sequences were obtained by removing sequences with  
164 ambiguous bases, a low-quality read length and/or chimeras identified using chimera uchime.  
165 Quality sequences were aligned and compared to the SILVA bacterial references alignment and  
166 OTUs were generated using a dissimilarity cutoff of 0.03. The sequences were classified using  
167 the classify seqs command.

### 168 **Statistical Analysis**

169 Differences in frequencies for categorical variables between cases and controls were evaluated  
170 using the chi squared. Risk was estimated and expressed as an odds ratio (OR) and a 95%  
171 confidence interval (CI). For numerical variables the Mann-Whitney or Student t tests were used  
172 based on the D'Agostino & Pearson normality test. We assessed the vaginal microbial diversity  
173 and the relative abundance of bacterial taxa using Phyloseq (37) along with additional R-based  
174 computational tools in R-studio (R-Studio, Boston, MA). Principal components analysis (PCA)  
175 was conducted using Phyloseq and statistically confirmed by PERMANOVA (Adonis test). The



176 Chao 1 and Shannon diversity indices were calculated using Phyloseq and statistically confirmed  
177 by Mann-Whitney (GraphPad Prism software, version 5c, San Diego, CA). Lefse analysis (38,  
178 39) was used to evaluate OTU-level microbiome differences between cases and controls.  
179 Multivariate association with linear models (MaAsLin, (38)) were used to calculate differentially  
180 abundant OTUs between the cases and controls, including several other study variables available  
181 from the metadata. The following covariates were fitted into the MaAsLin model based on  
182 previously reported associations with HPV infection or with microbiome shifts: SIL grade, HPV  
183 infection, HPV type, smoking, intermenstrual bleeding, sexual activity status, use of  
184 contraceptives, type of contraceptive, genital hygiene, age, age of sexual debut, number of sexual  
185 partners, number of sexual partners by age, number of pregnancies, number of births and number  
186 of miscarriages. The random forest classifier in R was applied to determine if differential  
187 microbiome taxa would be discriminant between cases and controls.

188

## 189 **RESULTS**

### 190 **Study participants characteristics: Cases vs. controls**

191 A total of 300 samples were analyzed, 143 controls 157 cases. Of the 157 cases, 112 were  
192 diagnosed with low squamous intraepithelial lesion (LSIL) (women diagnosed with HPV  
193 infection and cervical intraepithelial neoplasia 1 (CIN 1), and 45 were diagnosed with HPV  
194 infection and high squamous intraepithelial lesion (HSIL) (women diagnosed with CIN 2 or CIN  
195 3). All women were cancer free. For the selection of participants, HPV infection was determined  
196 by positive cytological, histological and colposcopy analysis.

197 However, by molecular analysis, within cases, the frequency of positivity to HPV infection  
198 detected was 90.45%, of which HPV-16, -58 and -18 types were the most frequently detected  
199 with 49.04%, 14.65% and 10.83%, respectively. Most of the women in both groups did not  
200 smoke (75.16% -cases vs 70.63% controls), had a regular menstrual period (70.70% cases vs  
201 69.23% controls), and most do not have intermenstrual bleeding (82.80% cases vs 89.51%  
202 controls). Statistically significant differences between groups were detected in relation with  
203 active sexual life at the time of the study (75.16% cases vs 92.31% controls), use of  
204 contraceptives (66.24% cases vs 53.15% controls) in the control group ( $P = 0.021$ ), and genital  
205 hygiene, recorded by the frequency of vaginal douching (83.44% cases group vs 53.85% control  
206 group) and such differences were statistically significant ( $P < 0.0001$ ). More details of the  
207 characteristics of each group are described in Table 1. When comparing continuous variables,  
208 cases and controls differed by age ( $36.3 \pm 0.9$  cases vs  $42.9 \pm 0.7$  controls), number of sexual  
209 partners by age (0.0038 cases vs 0.028 controls) and number of miscarriages (0.01 cases vs.  
210 0.014 controls; Table 2).

### 211 **Associations between the Vaginal Microbiota SIL status**

212 We determined the bacterial community by amplification and sequencing of the 16S rRNA gene  
213 (V3 region). The presence of SIL was associated with changes in bacterial alpha and beta  
214 diversity (Figure 1), with notable compositional differences at the family and genus level (Figure  
215 2). Beta-diversity analysis, measured by Principal Component Analysis (PCoA; Bray Curtis  
216 distance, Figure 1A) indicated that cervical SIL explain 14.6% of the variation in vaginal  
217 bacterial community structure ( $N=300$ ; Adonis  $P>0.001$ ). Presence of SIL was also associated  
218 with significantly higher species richness than women without SIL (Chao1;  $P=2.78e-07$ ; Fig.  
219 1B). Only a trend for an increase in alpha diversity (Shannon index) was observed in SIL-

220 positive participants, suggesting that the broadest diversity change is explained by bacterial  
221 community richness.

222 We utilized Lefse to identify OTU-level difference between SIL positive and negative groups. In  
223 this model, features are first tested to determine if they are differentially distributed. Microbial  
224 features violating the null hypothesis are further analyzed in a secondary analysis, in which a  
225 Latent Dirichlet Allocation (LDA) model is built to detect and rank microbiome feature  
226 differences among groups. Lefse identified a greater abundance of 12 OTUs in SIL-positive  
227 women, with OTU 14 (*S\_Brevibacterium\_aureum*), OTU 117 (F\_Veillonellaceae), OTU 28  
228 (*S\_Brachybacterium\_conglomeratum*), and OTU 101 (*Lactobacillus iners*) as the most  
229 differentially abundant features (Figure 3). In contrast, OTU 62 (*Sphingobium yanoikuyae*), OTU  
230 129 (*Zoogloea* sp.) and OTU 80 (*Sphingobium* sp.) were detected in higher abundance in the  
231 control samples (Figure 3). Among these, *Brevibacterium aureum* was exclusively detected in  
232 cases (Figure 4A), whereas *Zoogloea* sp. was exclusively detected in controls (Figure 4B). Other  
233 taxa that reached almost exclusive detection in either group include *Brachybacterium*  
234 *conglomeratum* and *Prevotella* sp. (Figure 4). Given this, we evaluated if any of these features  
235 could be used to predict SIL status by applying Random Forest analysis, which showed that none  
236 of the features can accurately classify a participant in the SIL positive or negative groups (overall  
237 error rate=0.67).

238 Given the importance to control for potential confounding variables, including several collected  
239 in this study that could explain or correlate with the detected associations between SIL status and  
240 the microbiota, we utilized MaAsLin. MaAsLin is a multivariate linear modeling tool with  
241 boosting that tests for associations between specific microbial taxa and continuous and/or  
242 Boolean metadata. This method reduces the total amount of correlations to be tested, therefore

243 allowing for improvements in the robustness of the additive general linear models. With  
244 MaAsLin, we found significant independent associations between SIL positive status and  
245 *Branchy bacterium conglomeratum*, as well as between SIL negative status and *Lactobacillus* sp.  
246 and *Sphingobium yanoikuyae*. This indicates that no other variable explained the taxonomic  
247 differences observed SIL status and these bacterial taxa. Interestingly, other independent  
248 associations were also detected between HPV subtypes or contraception use and several bacterial  
249 taxa (Table 3).

250

## 251 **DISCUSSION**

252 Several factors are known to play a role in cervical carcinogenesis, with HPV infection being one  
253 of the most important in the development of the disease (1). There are more than 100 types of  
254 HPV, of which at least 14 high-risk HPV types have been defined as carcinogenic (40). In this  
255 study we found that more than 90% of the group of cases were HPV positive and that almost  
256 50% of HPV infections are caused by the HPV-16 type, followed by HPV-58 and -18, all of  
257 them considered as high-risk HPVs worldwide (41). This predominance of the HPV-16 type was  
258 expected since it is generally accepted that HPV-16 is the major high-risk genotype in Mexico  
259 and in the world (42, 43). We also found HPV-58 as the second most prevalent genotype, in  
260 14.65% of the cases, aligned with has been reported in Asia (14.36 – 15.90 %) (42, 43).

261 Our study also revealed several other factors associated with SIL status, some of which reaffirm  
262 previously reported links (44). Factors positively associated with SIL included younger age,  
263 HPV infection, younger age of sexual debut, number of sexual partners by age, number of  
264 pregnancies and births by age, and the use of contraceptives, with the biggest difference  
265 explained by IUD use. In contrast, being sexually active at the time of the study, vaginal

266 douching and number of miscarriages were linked to a reduced risk to SIL in this group of  
267 women.

268 Regarding contraceptive use, our result differs from that reported by Cortessis *et al.* (45), in  
269 which they indicated that invasive cervical cancer can be approximately 30% less frequent in  
270 women who have used IUD. Likewise, Agenjo *et al.* (46) described an inverse relationship  
271 between IUD use and cervical cancer risk, with women using IUD reporting half the risk of  
272 developing this type of cancer. Our contrasting results, however, are in line with previous  
273 microbiome correlations with cervical cancer. We found significant correlations with IUD use  
274 and the presence of *Acinetobacter lwoffii*, which has been previously reported in HPV-positive  
275 women (47). In addition, we detected an independent positive correlation with the use of IUD  
276 and *Fusobacterium* sp. and a taxon of the Tissierellaceae family. *Fusobacterium* has been  
277 studied as a possible diagnostic biomarker of cervical cancer since it is positively correlated with  
278 tumor differentiation (48). Furthermore, both Tissierellaceae and Fusobacteriaceae have been  
279 reported as the most abundant microorganisms in cervical carcinoma (49). Thus, while the  
280 relationship between IUD use and cervical cancer remains varied across studies, our results  
281 support that IUD use is linked to vaginal bacteria previously detected in greater abundance in  
282 cervical cancer. The fact that we detected a link between contraception and SIL for IUD only,  
283 and not for other forms of hormonal or physical contraception methods may suggest that the use  
284 of IUD could favor the growth of specific bacterial species that may either induce changes in the  
285 cervical microenvironment that could favor HPV infection, or alternatively, facilitate HPV  
286 infection via microbial interactions. It is also possible that these bacterial changes are a  
287 consequence of the anatomical and immune changes associated with SIL and cervical cancer.

288 Future work should study host-microbe interactions involving these bacterial species and HPV in

289 experimental models of cervical cancer, as well as microbiome features associated with IUD use  
290 in healthy women. This mode of contraception is widely used by women across the world; thus,  
291 it is important to further elucidate if microbial species linked to IUD use could be causally linked  
292 to HPV infection and cervical cancer risk.

293 While it is unclear why younger age was linked to SIL in our study, it is likely that it relates to  
294 the common age of onset of SIL, which occurs between 25-35 years of age (50, 51). In contrast,  
295 healthy women would be less likely to visit the IMSS for a routine gynecological visit. Our  
296 microbiome results did not find any differences associated with age, suggesting that age did not  
297 confound our results. Several study variables linked sexual activity with SIL, included younger  
298 age of sexual debut and number of sexual partners per age. These and other related sexual  
299 behavioral factors have been previously linked with SIL, HPV infection and cervical cancer risk  
300 (52). Interestingly, our study revealed that vaginal douching was linked to a reduced risk of SIL  
301 (OR 0.23 CI 0.14-0.39). Studies on cervical cancer and vaginal douching have reported positive,  
302 negative and no associations (53). Although it is unlikely that SIL would lead to symptoms that  
303 would motivate genital douching, this practice is more common among women with other risk  
304 factors linked to sexually transmitted infections, which are a common cause of symptoms.

305 Among the predominant components of a healthy vaginal microbiome are *Lactobacillus* species,  
306 including *L. crispatus*, *L. iners*, *L. jensenii*, and *L. gasseri* (17, 54), which results in reduced  
307 community diversity. Indeed, bacterial richness increases as *Lactobacillus* spp. levels are  
308 reduced in association with precursor lesions of cervical cancer (17) and with HPV infection  
309 itself (2, 55, 56). In support to this, our results showed higher species richness in cases as well as  
310 shifts on beta-diversity. Compositional differences involved several taxa, including lactobacilli.  
311 While one *L. iners* OTU had greater relative abundance in positive cases, two other significantly

312 more predominant *Lactobacillus* OTUs were decreased in women with SIL, explaining on  
313 overall reduction in lactobacilli (Figure 2). *L. iners* has been previously associated with a  
314 dysbiotic community and displays a series of characteristics that make this species different from  
315 other known vaginal lactobacilli (57–59). For instance, *L. iners* is a lower producer of D-lactic  
316 acid and induces IL-8 secretion causing pro-inflammatory activity in the cervix, which may  
317 influence the progression of cervical intraepithelial neoplasia (15). In other studies, the  
318 dominance of *L. iners* and interactions with other vaginal anaerobic microorganisms alters the  
319 balance of the vaginal microbiota in association with cervical intraepithelial neoplasia (13).

320 The most discriminant microbial differences between cases and controls involved  
321 *Brevibacterium aureum* and *Brachybacterium conglomeratum* (increased in cases), as well as  
322 *Zoogloea* sp. and *Prevotella* sp. (increased in controls; Figure 4). While these differences were  
323 very significant, these species were not uniformly present among either group suggesting that  
324 interindividual compositional differences may prevent to identify microbiota species with  
325 biomarker potential for HPV infection or SIL. However, our study identified *Brachybacterium*  
326 *conglomeratum* as independently associated with SIL and with HPV-16, the most common  
327 subtype detected in our study. This prompts for future investigation on the link of this bacterial  
328 species with SIL risk associated with this specific HPV subtype and raises the possibility that  
329 microbiome links with HPV infection are subtype specific. To our knowledge, this is the first  
330 time this species is linked to HPV infection or SIL. *B. conglomeratum* has not been readily  
331 reported in vaginal microbiome studies either, which have mainly surveyed North American and  
332 European populations (60–62). This finding underlines the importance to consider ethnicity and  
333 geography-driven differences in human microbiome studies, as dysbiotic patterns may be  
334 population-specific.

335

## 336 **ACKNOWLEDGMENTS**

337 The present work was supported by PAPIIT-DGAPA-UNAM grant IN215018 from the  
338 Universidad Nacional Autónoma de México (UNAM) and grant number -272601 from Consejo  
339 Nacional de Ciencia y Tecnología (CONACyT), as well as Canadian Institutes of Health Research  
340 (CIHR) grants to B.B. We appreciate the technical support of M in Sc. Martha Elena Zaragoza  
341 and QFB Angeles Padilla.

342

## 343 **REFERENCES**

- 344 1. Berti FCB, Salviano-Silva A, Beckert HC, de Oliveira KB, Cipolla GA, Malheiros D.  
345 2019. From squamous intraepithelial lesions to cervical cancer: Circulating microRNAs as  
346 potential biomarkers in cervical carcinogenesis. *Biochim Biophys Acta - Rev Cancer*.
- 347 2. Borgogna JC, Shardell MD, Santori EK, Nelson TM, Rath JM, Glover ED, Ravel J,  
348 Gravitt PE, Yeoman CJ, Brotman RM. 2020. The vaginal metabolome and microbiota of  
349 cervical HPV-positive and HPV-negative women: a cross-sectional analysis. *BJOG An Int*  
350 *J Obstet Gynaecol* 127.
- 351 3. Curty G, Costa RL, Siqueira JD, Meyrelles AI, Machado ES, Soares EA, Soares MA.  
352 2017. Analysis of the cervical microbiome and potential biomarkers from postpartum  
353 HIV-positive women displaying cervical intraepithelial lesions. *Sci Rep* 7.
- 354 4. Wilkinson EJ, Cox JT, Selim MA, O'Connor DM. 2015. Evolution of terminology for  
355 human-papillomavirus-infection-related vulvar squamous intraepithelial lesions. *J Low*  
356 *Genit Tract Dis* 19.



- 357 5. Forman D, de Martel C, Lacey CJ, Soerjomatarama I, Lortet-Tieulent J, Bruni L, Vignat J,  
358 Ferlay J, Bray F, Plummer M, Franceschi S. 2012. Global burden of human  
359 papillomavirus and related diseases. *Vaccine*.
- 360 6. Parkin DM, Almonte M, Bruni L, Clifford G, Curado MP, Piñeros M. 2008. Burden and  
361 Trends of Type-Specific Human Papillomavirus Infections and Related Diseases in the  
362 Latin America and Caribbean Region. *Vaccine* 26.
- 363 7. Pérez-Quintanilla M, Méndez-Martínez R, Vázquez-Vega S, Espinosa-Romero R, Sotelo-  
364 Regil R, Pérez-Montiel MD, Ramos-Alamillo U, De Jesús Cabrera-López T, Barquet-  
365 Muñoz SA, Pérez-Plascencia C, García-Carrancá A, De León DC. 2020. High prevalence  
366 of human papillomavirus and European variants of HPV 16 infecting concomitantly to  
367 cervix and oral cavity in HIV positive women. *PLoS One* 15.
- 368 8. Feng RM, Hu SY, Zhao FH, Zhang R, Zhang X, Wallach AI, Qiao YL. 2017. Role of  
369 active and passive smoking in high-risk human papillomavirus infection and cervical  
370 intraepithelial neoplasia grade 2 or worse. *J Gynecol Oncol* 28.
- 371 9. Audirac-Chalifour A, Torres-Poveda K, Bahena-Román M, Téllez-Sosa J, Martínez-  
372 Barnette J, Cortina-Ceballos B, López-Estrada G, Delgado-Romero K, Burguete-García  
373 AI, Cantú D, García-Carrancá A, Madrid-Marina VMM. 2016. Cervical microbiome and  
374 cytokine profile at various stages of cervical cancer: A pilot study. *PLoS One* 11.
- 375 10. Vonaesch P, Anderson M, Sansonetti PJ. 2018. Pathogens, microbiome and the host:  
376 Emergence of the ecological Koch's postulates. *FEMS Microbiol Rev*.
- 377 11. Moosa Y, Kwon D, de Oliveira T, Wong EB. 2020. Determinants of Vaginal Microbiota  
378 Composition. *Front Cell Infect Microbiol*.
- 379 12. Łaniewski P, Cui H, Roe DJ, Barnes D, Goulder A, Monk BJ, Greenspan DL, Chase DM,

- 380 Herbst-Kralovetz MM. 2019. Features of the cervicovaginal microenvironment drive  
381 cancer biomarker signatures in patients across cervical carcinogenesis. *Sci Rep* 9.
- 382 13. Ilhan ZE, Łaniewski P, Thomas N, Roe DJ, Chase DM, Herbst-Kralovetz MM. 2019.  
383 Deciphering the complex interplay between microbiota, HPV, inflammation and cancer  
384 through cervicovaginal metabolic profiling. *EBioMedicine* 44.
- 385 14. Kim TK, Thomas SM, Ho M, Sharma S, Reich CI, Frank JA, Yeater KM, Biggs DR,  
386 Nakamura N, Stumpf R, Leigh SR, Tapping RI, Blanke SR, Slauch JM, Gaskins HR,  
387 Weisbaum JS, Olsen GJ, Hoyer LL, Wilson BA. 2009. Heterogeneity of vaginal microbial  
388 communities within individuals. *J Clin Microbiol* 47.
- 389 15. Piyathilake CJ, Ollberding NJ, Kumar R, Macaluso M, Alvarez RD, Morrow CD. 2016.  
390 Cervical microbiota associated with higher grade cervical intraepithelial neoplasia in  
391 women infected with high-risk human papillomaviruses. *Cancer Prev Res* 9.
- 392 16. Gao W, Weng J, Gao Y, Chen X. 2013. Comparison of the vaginal microbiota diversity of  
393 women with and without human papillomavirus infection: A cross-sectional study. *BMC*  
394 *Infect Dis* 13.
- 395 17. Kovachev SM. 2020. Cervical cancer and vaginal microbiota changes. *Arch Microbiol*  
396 202.
- 397 18. Shigehara K, Kawaguchi S, Sasagawa T, Furubayashi K, Shimamura M, Maeda Y,  
398 Konaka H, Mizokami A, Koh E, Namiki M. 2011. Prevalence of genital *Mycoplasma*,  
399 *Ureaplasma*, *Gardnerella*, and human papillomavirus in Japanese men with urethritis, and  
400 risk factors for detection of urethral human papillomavirus infection. *J Infect Chemother*  
401 17.
- 402 19. Ritu W, Enqi W, Zheng S, Wang J, Ling Y, Wang Y. 2019. Evaluation of the associations

- 403 between cervical microbiota and HPV infection, clearance, and persistence in  
404 cytologically normal women. *Cancer Prev Res* 12.
- 405 20. Anahtar MN, Byrne EH, Doherty KE, Bowman BA, Yamamoto HS, Soumillon M,  
406 Padavattan N, Ismail N, Moodley A, Sabatini ME, Ghebremichael MS, Nusbaum C,  
407 Huttenhower C, Virgin HW, Ndung'u T, Dong KL, Walker BD, Fichorova RN, Kwon  
408 DS. 2015. Cervicovaginal Bacteria Are a Major Modulator of Host Inflammatory  
409 Responses in the Female Genital Tract. *Immunity* 42.
- 410 21. Lamont RF, Sobel JD, Akins RA, Hassan SS, Chaiworapongsa T, Kusanovic JP, Romero  
411 R. 2011. The vaginal microbiome: New information about genital tract flora using  
412 molecular based techniques. *BJOG An Int J Obstet Gynaecol*.
- 413 22. Mortaki D, Gkegkes ID, Psomiadou V, Blontzos N, Prodromidou A, Lefkopoulos F,  
414 Nicolaidou E. 2020. Vaginal microbiota and human papillomavirus: A systematic review.  
415 *J Turkish Ger Gynecol Assoc*.
- 416 23. Bychkovsky BL, Ferreyra ME, Strasser-Weippl K, Herold CI, De Lima Lopes G, Dizon  
417 DS, Schmeler KM, Del Carmen M, Randall TC, Nogueira-Rodrigues A, De Carvalho  
418 Calabrich AF, St. Louis J, Vail CM, Goss PE. 2016. Cervical cancer control in Latin  
419 America: A call to action. *Cancer*.
- 420 24. Fosch SE, Fico seco CA, Marchesi A, Cocucci S, Nader-Macias MEF, Perazzi BE. 2018.  
421 Contraception: Influence on Vaginal Microbiota and Identification of Vaginal Lactobacilli  
422 Using MALDI-TOF MS and 16S rDNA Sequencing. *Open Microbiol J* 12.
- 423 25. Romero-Morelos P, Bandala C, Jiménez-Tenorio J, Valdespino-Zavala M, Rodríguez-  
424 Esquivel M, Gama-Ríos RA, Bandera A, Mendoza-Rodríguez M, Taniguchi K, Marrero-  
425 Rodríguez D, López-Romero R, Ramón-Gallegos E, Salcedo M. 2019. Vaginosis-

- 426 associated bacteria and its association with HPV infection. *Med Clin (Barc)* 152.
- 427 26. Musa J, Achenbach CJ, O'Dwyer LC, Evans CT, McHugh M, Hou L, Simon MA,  
428 Murphy RL, Jordan N. 2017. Effect of cervical cancer education and provider  
429 recommendation for screening on screening rates: A systematic review and meta-analysis.  
430 *PLoS One*.
- 431 27. Ferlay J, Colombet M, Soerjomataram I, Mathers C, Parkin DM, Piñeros M, Znaor A,  
432 Bray F. 2019. Estimating the global cancer incidence and mortality in 2018: GLOBOCAN  
433 sources and methods. *Int J Cancer*.
- 434 28. Berek JS, Parham GP, Felix JC. 2003. Simplification of the New Bethesda 2001  
435 classification system *American Journal of Obstetrics and Gynecology*.
- 436 29. Sepp R, Szabo I, Uda H, Sakamoto H. 1994. Rapid techniques for DNA extraction from  
437 routinely processed archival tissue for use in PCR. *J Clin Pathol* 47.
- 438 30. Manos MM, Ting YT, Wright DK, Lewis AL, Broker TR, Wolinsky SM, Manos M, Ting  
439 YC. 1989. Use of polymerase chain reaction amplification for the detection of genital  
440 human papillomaviruses. *Cancer Cells Mol Diagnostics Hum Cancer* 7.
- 441 31. De Roda Husman AM, Walboomers JMM, Van den Brule AJC, Meijer CJLM, Snijders  
442 PJF. 1995. The use of general primers GP5 and GP6 elongated at their 3' ends with  
443 adjacent highly conserved sequences improves human papillomavirus detection by PCR. *J*  
444 *Gen Virol* 76.
- 445 32. Liaw KL, Glass AG, Manos MM, Greer CE, Scott DR, Sherman M, Burk RD, Kurman  
446 RJ, Wacholder S, Rush BB, Cadell DM, Lawler P, Tabor D, Schiffman M. 1999.  
447 Detection of human papillomavirus DNA in cytologically normal women and subsequent  
448 cervical squamous intraepithelial lesions. *J Natl Cancer Inst* 91.

- 449 33. Meissner JD. 1999. Nucleotide sequences and further characterization of human  
450 papillomavirus DNA present in the CaSki, SiHa and HeLa cervical carcinoma cell lines. *J*  
451 *Gen Virol* 80.
- 452 34. Bartram AK, Lynch MDJ, Stearns JC, Moreno-Hagelsieb G, Neufeld JD. 2011.  
453 Generation of multimillion-sequence 16S rRNA gene libraries from complex microbial  
454 communities by assembling paired-end Illumina reads. *Appl Environ Microbiol* 77.
- 455 35. Comeau AM, Douglas GM, Langille MGI. 2017. Microbiome Helper: a Custom and  
456 Streamlined Workflow for Microbiome Research. *mSystems* 2.
- 457 36. Schloss PD, Gevers D, Westcott SL. 2011. Reducing the effects of PCR amplification and  
458 sequencing Artifacts on 16s rRNA-based studies. *PLoS One* 6.
- 459 37. McMurdie PJ, Holmes S. 2015. Shiny-phyloseq: Web application for interactive  
460 microbiome analysis with provenance tracking. *Bioinformatics* 31.
- 461 38. Kageyama S, Takeshita T, Takeuchi K, Asakawa M, Matsumi R, Furuta M, Shibata Y,  
462 Nagai K, Ikebe M, Morita M, Masuda M, Toh Y, Kiyohara Y, Ninomiya T, Yamashita Y.  
463 2019. Characteristics of the salivary microbiota in patients with various digestive tract  
464 cancers. *Front Microbiol* 10.
- 465 39. Segata N, Izard J, Waldron L, Gevers D, Miropolsky L, Garrett WS, Huttenhower C.  
466 2011. Metagenomic biomarker discovery and explanation. *Genome Biol* 12.
- 467 40. Wang R, Pan W, Jin L, Huang W, Li Y, Wu D, Gao C, Ma D, Liao S. 2020. Human  
468 papillomavirus vaccine against cervical cancer: Opportunity and challenge. *Cancer Lett.*
- 469 41. Chan CK, Aimagambetova G, Ukybassova T, Kongrtay K, Azizan A. 2019. Human  
470 Papillomavirus Infection and Cervical Cancer: Epidemiology, Screening, and Vaccination  
471 - Review of Current Perspectives. *J Oncol.*

- 472 42. Illades-Aguilar B, Alarcón-Romero L del C, Antonio-Véjar V, Zamudio-López N, Sales-  
473 Linares N, Flores-Alfaro E, Fernández-Tilapa G, Vences-Velázquez A, Muñoz-Valle JF,  
474 Leyva-Vázquez MA. 2010. Prevalence and distribution of human papillomavirus types in  
475 cervical cancer, squamous intraepithelial lesions, and with no intraepithelial lesions in  
476 women from Southern Mexico. *Gynecol Oncol* 117.
- 477 43. Zhang J, Cheng K, Wang Z. 2020. Prevalence and distribution of human papillomavirus  
478 genotypes in cervical intraepithelial neoplasia in China: a meta-analysis. *Arch Gynecol*  
479 *Obstet*.
- 480 44. Castellsagué X. 2008. Natural history and epidemiology of HPV infection and cervical  
481 cancer. *Gynecol Oncol* 110.
- 482 45. Cortessis VK, Barrett M, BrownWade N, Enebish T, Perrigo JL, Tobin J, Zhong C, Zink  
483 J, Isiaka V, Muderspach LI, Natavio M, McKean-Cowdin R. 2017. Intrauterine device use  
484 and cervical cancer risk: A systematic review and meta-analysis *Obstetrics and*  
485 *Gynecology*.
- 486 46. Agenjo González M, Lampaya Nasarre B, Salazar F, Varillas D, Cristobal I. 2019.  
487 Influence of intrauterine dispositive in human papillomavirus clearance. *Eur J Obstet*  
488 *Gynecol Reprod Biol* <https://doi.org/10.1016/j.ejogrb.2018.11.016>.
- 489 47. Chao XP, Sun TT, Wang S, Fan QB, Shi HH, Zhu L, Lang JH. 2019. Correlation between  
490 the diversity of vaginal microbiota and the risk of high-risk human papillomavirus  
491 infection. *Int J Gynecol Cancer* 29.
- 492 48. Huang SI, Chen J, Lian LY, Cai HH, Zeng HS, Liu MB, Huang SI, Chen J, Lian LY, Cai  
493 HH, Zeng HS, Liu MB, Zheng M. 2020. Intratumoral levels and prognostic significance of  
494 *Fusobacterium nucleatum* in cervical carcinoma. *Aging (Albany NY)* 12.

- 495 49. Hu J, Gao Y, Zheng Y, Shang X. 2018. KF-finder: Identification of key factors from host-  
496 microbial networks in cervical cancer. *BMC Syst Biol* 12.
- 497 50. Wudtisan J, Tantipalakorn C, Charoenkwan K, Sreshtaputra RA, Srisomboon J. 2019.  
498 Factors associated with development of high-grade squamous intraepithelial lesions of the  
499 uterine cervix in women younger than 30 years. *Asian Pacific J Cancer Prev*  
500 <https://doi.org/10.31557/APJCP.2019.20.4.1031>.
- 501 51. Pelkofski E, Stine J, Wages NA, Gehrig PA, Kim KH, Cantrell LA. 2016. Cervical Cancer  
502 in Women Aged 35 Years and Younger. *Clin Ther*  
503 <https://doi.org/10.1016/j.clinthera.2016.01.024>.
- 504 52. Jespers V, Hardy L, Buyze J, Loos J, Buvé A, Crucitti T. 2016. Association of sexual  
505 debut in adolescents with microbiota and inflammatory markers. *Obstet Gynecol* 128.
- 506 53. Martino JL, Vermund SH. 2002. Vaginal douching: Evidence for risks or benefits to  
507 women's health. *Epidemiol Rev.*
- 508 54. Łaniewski P, Barnes D, Goulder A, Cui H, Roe DJ, Chase DM, Herbst-Kralovetz MM.  
509 2018. Linking cervicovaginal immune signatures, HPV and microbiota composition in  
510 cervical carcinogenesis in non-Hispanic and Hispanic women. *Sci Rep* 8.
- 511 55. Devillard E, Burton JP, Reid G. 2005. Complexity of vaginal microflora as analyzed by  
512 PCR denaturing gradient gel electrophoresis in a patient with recurrent bacterial vaginosis.  
513 *Infect Dis Obstet Gynecol* 13.
- 514 56. Ling Z, Liu X, Chen X, Zhu H, Nelson KE, Xia Y, Li L, Xiang C. 2011. Diversity of  
515 Cervicovaginal Microbiota Associated with Female Lower Genital Tract Infections.  
516 *Microb Ecol* 61.
- 517 57. Antonio MAD, Meyn LA, Murray PJ, Busse B, Hillier SL. 2009. Vaginal colonization by

- 518 probiotic lactobacillus crispatus CTV-05 is decreased by sexual activity and endogenous  
519 lactobacilli. *J Infect Dis* 199.
- 520 58. Borgdorff H, Armstrong SD, Tytgat HLP, Xia D, Ndayisaba GF, Wastling JM, Van De  
521 Wijgert JHHM. 2016. Unique insights in the cervicovaginal *Lactobacillus iners* and *L.*  
522 *crispatus* proteomes and their associations with microbiota dysbiosis. *PLoS One* 11.
- 523 59. Borgdorff H, Gautam R, Armstrong SD, Xia D, Ndayisaba GF, Van Teijlingen NH,  
524 Geijtenbeek TBH, Wastling JM, Van De Wijgert JHHM. 2016. Cervicovaginal  
525 microbiome dysbiosis is associated with proteome changes related to alterations of the  
526 cervicovaginal mucosal barrier. *Mucosal Immunol* 9.
- 527 60. Ma B, Forney LJ, Ravel J. 2012. Vaginal microbiome: Rethinking health and disease.  
528 *Annu Rev Microbiol* <https://doi.org/10.1146/annurev-micro-092611-150157>.
- 529 61. Ravel J, Gajer P, Abdo Z, Schneider GM, Koenig SSK, McCulle SL, Karlebach S, Gorle  
530 R, Russell J, Tacket CO, Brotman RM, Davis CC, Ault K, Peralta L, Forney LJ. 2011.  
531 Vaginal microbiome of reproductive-age women. *Proc Natl Acad Sci U S A* 108.
- 532 62. White BA, Creedon DJ, Nelson KE, Wilson BA. 2011. The vaginal microbiome in health  
533 and disease. *Trends Endocrinol Metab*.
- 534
- 535



536 Table 1. Characteristics of Study Population. Categorical Variables.

| Variable                                         | Subcategory    | With SILs<br>(N=157) | Without SILs<br>(N=143) | P                 | OR   | CI                 |
|--------------------------------------------------|----------------|----------------------|-------------------------|-------------------|------|--------------------|
| <b>SILs Grade</b>                                | Low grade      | 112                  | 0                       | N/A               | N/A  | N/A                |
|                                                  | High grade     | 45                   | 0                       |                   |      |                    |
| <b>HPV</b>                                       | Positive       | 142 (90.45%)         | 0                       | <b>&lt;0.0001</b> | ∞    | 355.4<br>to ∞      |
|                                                  | Negative       | 15 (9.55%)           | 143 (100%)              |                   |      |                    |
| <b>HPV type</b>                                  | HPV-16         | 77(49.04%)           | 0                       | N/A               | N/A  | N/A                |
|                                                  | HPV-58         | 23(14.65%)           | 0                       |                   |      |                    |
|                                                  | HPV-18         | 17(10.83%)           | 0                       |                   |      |                    |
|                                                  | HPV-31         | 7(4.46%)             | 0                       |                   |      |                    |
|                                                  | HPV-11         | 4(2.55%)             | 0                       |                   |      |                    |
|                                                  | Other          | 14(8.92%)            | 0                       |                   |      |                    |
|                                                  | HPV Neg        | 15(9.55%)            | 143(100%)               |                   |      |                    |
| <b>Smoking</b>                                   | Yes            | 39(24.84%)           | 42(29.37%)              | 0.38              | 0.79 | 0.47<br>to<br>1.32 |
|                                                  | No             | 118(75.16%)          | 101(70.63%)             |                   |      |                    |
| <b>Menstrual period</b>                          | Regular        | 111(70.70%)          | 99(69.23%)              | 0.78              | 1.07 | 0.66<br>to<br>1.73 |
|                                                  | Irregular      | 46(29.30%)           | 44(30.77%)              |                   |      |                    |
| <b>Intermenstrual<br/>bleeding</b>               | Yes            | 27(17.20%)           | 15(10.49%)              | 0.095             | 1.77 | 0.89<br>to<br>3.41 |
|                                                  | No             | 130(82.80%)          | 128(89.51%)             |                   |      |                    |
| <b>Sexually active (at<br/>study assessment)</b> | Yes            | 118(75.16%)          | 132(92.31%)             | <b>&lt;0.0001</b> | 0.25 | 0.12<br>to<br>0.51 |
|                                                  | No             | 39(24.84%)           | 11(7.69%)               |                   |      |                    |
| <b>Use of<br/>contraceptive(s)</b>               | Yes            | 104(66.24%)          | 76(53.15%)              | <b>0.021</b>      | 0.58 | 0.37<br>to<br>0.93 |
|                                                  | No             | 53(33.76%)           | 67(46.85%)              |                   |      |                    |
| <b>Contraceptive type</b>                        | IUD            | 39(24.84%)           | 17(11.89%)              | <b>0.0001</b>     | N/A  | N/A                |
|                                                  | Tubal ligation | 27(17.20%)           | 21(14.69%)              |                   |      |                    |
|                                                  | Hormonal       | 20(12.74%)           | 13(9.09%)               |                   |      |                    |

|                         |                    |             |            |                   |      |              |
|-------------------------|--------------------|-------------|------------|-------------------|------|--------------|
|                         | Condom             | 10(6.37%)   | 3(2.10%)   |                   |      |              |
|                         | IUD+Tubal Ligation | 2(1.27%)    | 0          |                   |      |              |
|                         | Other              | 6(3.82%)    | 10(6.99%)  |                   |      |              |
|                         | Did not specify    | 0           | 13(9.09%)  |                   |      |              |
|                         | None               | 53(33.76)   | 66(46.15%) |                   |      |              |
| <b>Vaginal douching</b> | Yes                | 26(16.56%)  | 66(46.15%) | <b>&lt;0.0001</b> | 0.23 | 0.14 to 0.39 |
|                         | No                 | 131(83.44%) | 77(53.85%) |                   |      |              |

537 P values in bold denote statistical significance (P>0.05)

538

539

540 Table 2. Characteristics of Study Population. Numerical variables.

| Variable                         | With SILs (157) | Without SILs (143) | Normality test (D'Agostino & Pearson) | <i>P</i>          |
|----------------------------------|-----------------|--------------------|---------------------------------------|-------------------|
| Age                              | 36.29 ± 0.89    | 42.86 ± 0.65       | Yes                                   | <b>&lt;0.0001</b> |
| Age since sexually active        | 18              | 20                 | No                                    | <b>&lt;0.0001</b> |
| Number of sexual partners        | 1               | 1                  | No                                    | 0.39              |
| Number of sexual partners by age | 0.038           | 0.028              | No                                    | <b>0.0003</b>     |
| Number of pregnancies            | 3               | 3                  | No                                    | 0.75              |
| Number of births                 | 2               | 2                  | No                                    | 0.22              |
| Number of miscarriages           | 0.010           | 0.014              | No                                    | <b>0.0082</b>     |

541 Mean ±SD or median values based on D'Agostino & Pearson normality test. P values in bold denote  
542 statistical significance (P>0.05)

543

544 Table 3. Differential OTUs in relation to study variables (MaAsLiN). Features organized in ascending order  
545 of adjusted P values

| Variable      | Feature                                       | Value  | P.value  | Q.value  |
|---------------|-----------------------------------------------|--------|----------|----------|
| Contraception | <i>G_Fusobacterium</i> _Otu105                | IUD    | 2.4E-110 | 7.8E-106 |
| HPV_type      | <i>G_Mycoplasma</i> _Otu46                    | HPV-90 | 3.2E-39  | 4.2E-35  |
| Contraception | <i>S_Acinetobacter_lwoffii</i> _Otu127        | IUD    | 7.3E-31  | 8.1E-27  |
| Contraception | <i>F_Tissierellaceae</i> _Otu174              | IUD    | 3.8E-15  | 3.2E-11  |
| Contraception | <i>S_Brevundimonas_diminuta</i> _Otu106       | IUD    | 2.5E-13  | 1.7E-09  |
| Contraception | <i>F_Micrococcaceae</i> _Otu49                | IUD    | 3.9E-12  | 2.2E-08  |
| SILs          | <i>F_Brachybacterium_conglomeratum</i> _Otu28 | POS    | 6.5E-11  | 3.1E-07  |
| SILs          | <i>G_Lactobacillus</i> _Otu6                  | NEG    | 1.2E-08  | 3.3E-05  |
| SILs          | <i>S_Sphingobium_yanoikuyae</i> _Otu62        | NEG    | 2.0E-07  | 3.1E-03  |
| Contraception | O_BD7-3_Otu216                                | IUD    | 5.70E-07 | 1.6E-04  |
| SILs          | <i>G_Lactobacillus</i> _Otu23                 | NEG    | 2.42E-06 | 4.14E-04 |
| HPV_type      | <i>S_Brachybacterium_conglomeratum</i> _Otu28 | HPV-16 | 1.02E-05 | 1.93E-02 |
| HPV_type      | <i>S_Lactobacillus_iners</i> _Otu101          | HPV-83 | 1.69E-05 | 2.8E-02  |
| Age           | <i>S_Streptococcus_anginosus</i> _Otu33       | Age    | 1.71E-04 | 2.5E-02  |

546

547

548

549

550

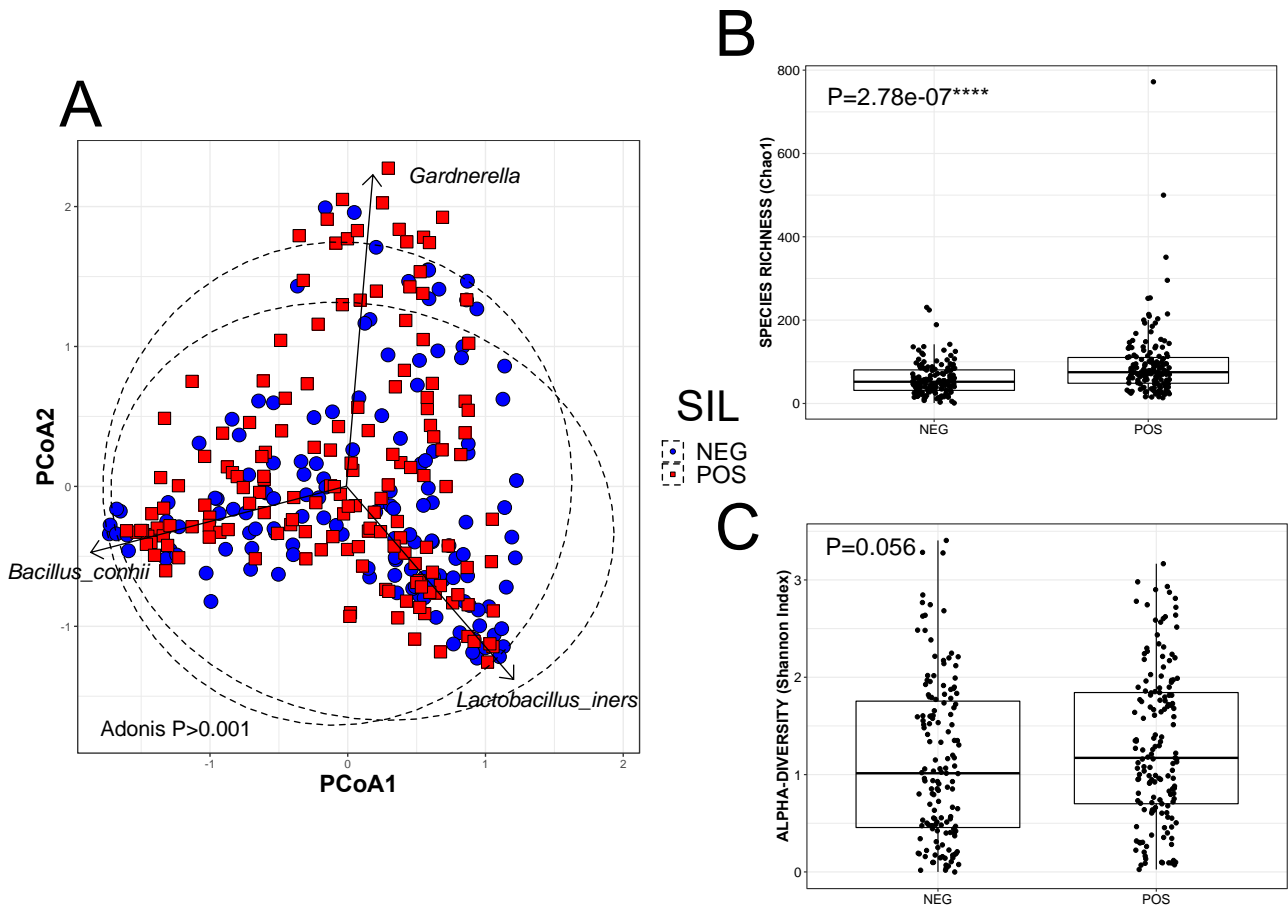

551

552 **FIGURE 1. (A)** Principal component analysis (PCoA) ordination of variation in beta-diversity of human  
553 cervical bacterial communities in adult Mexican women based on Bray-Curtis dissimilarities. Color and  
554 shape represent presence of squamous cervical intraepithelial lesions (SIL); blue circles represent  
555 absence of SIL and red squares represent presence of SIL. PERMANOVAs indicate the SIL represent  
556 14.6% of the variation in vaginal bacterial community structure (N=300; Adonis P>0.001). Arrows  
557 represent loading plot coordinates for the three most abundant OTU features in the dataset. Variation in  
558 **(B)** species richness (Chao1) and **(C)** alpha-diversity (Shannon index) of vaginal bacterial communities  
559 between women with (POS) and without (NEG) SIL. Stars denote statistical significance (N=300; Kruskal-  
560 Wallis test; Chao1  $P=2.78e-07$ ).

561

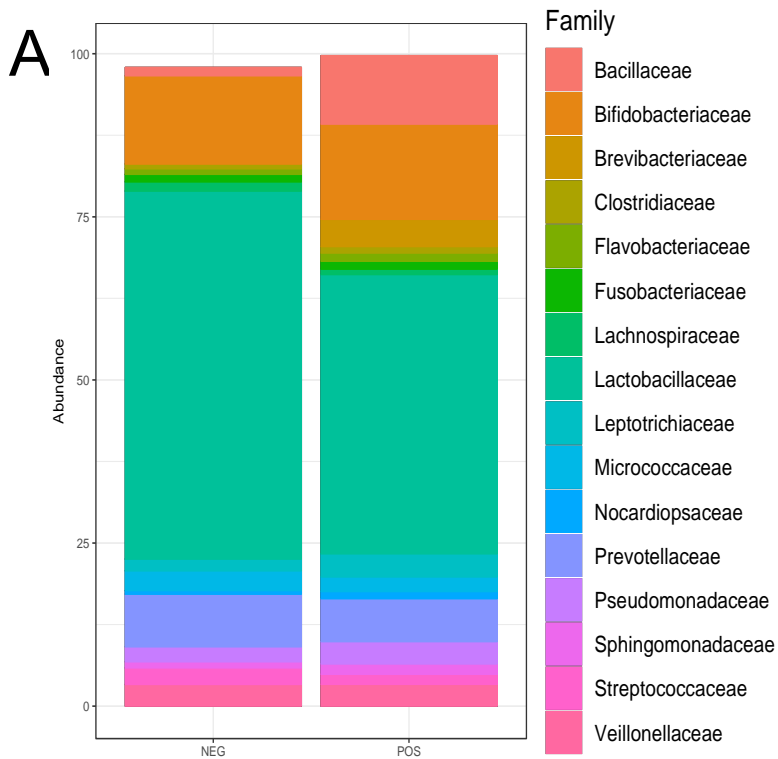

562

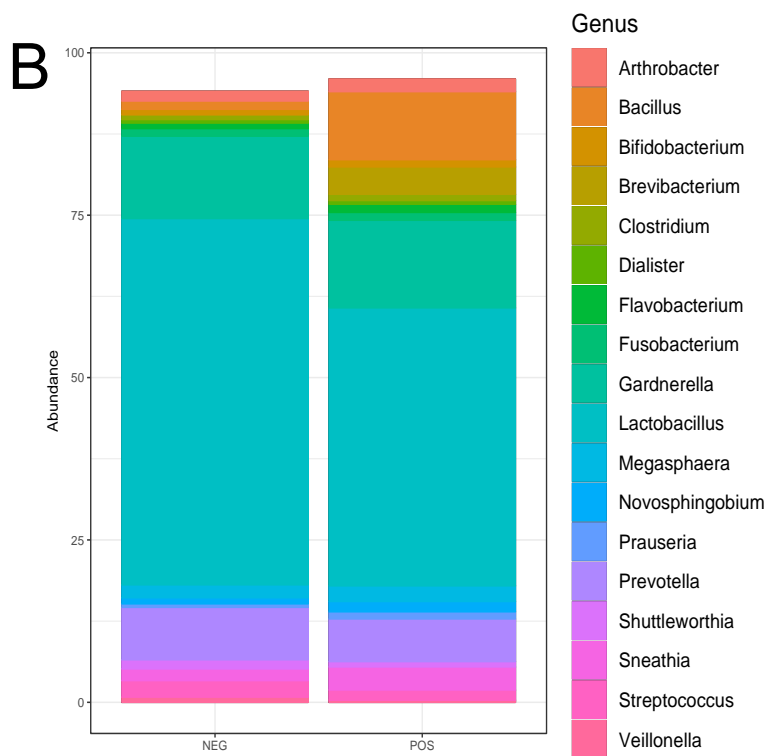

563

564 **FIGURE 2.** Variation in taxonomic composition of vaginal bacterial communities at the family (A) and genus  
565 (B) levels between women with and without cervical SIL (N=300).  
566

567

568

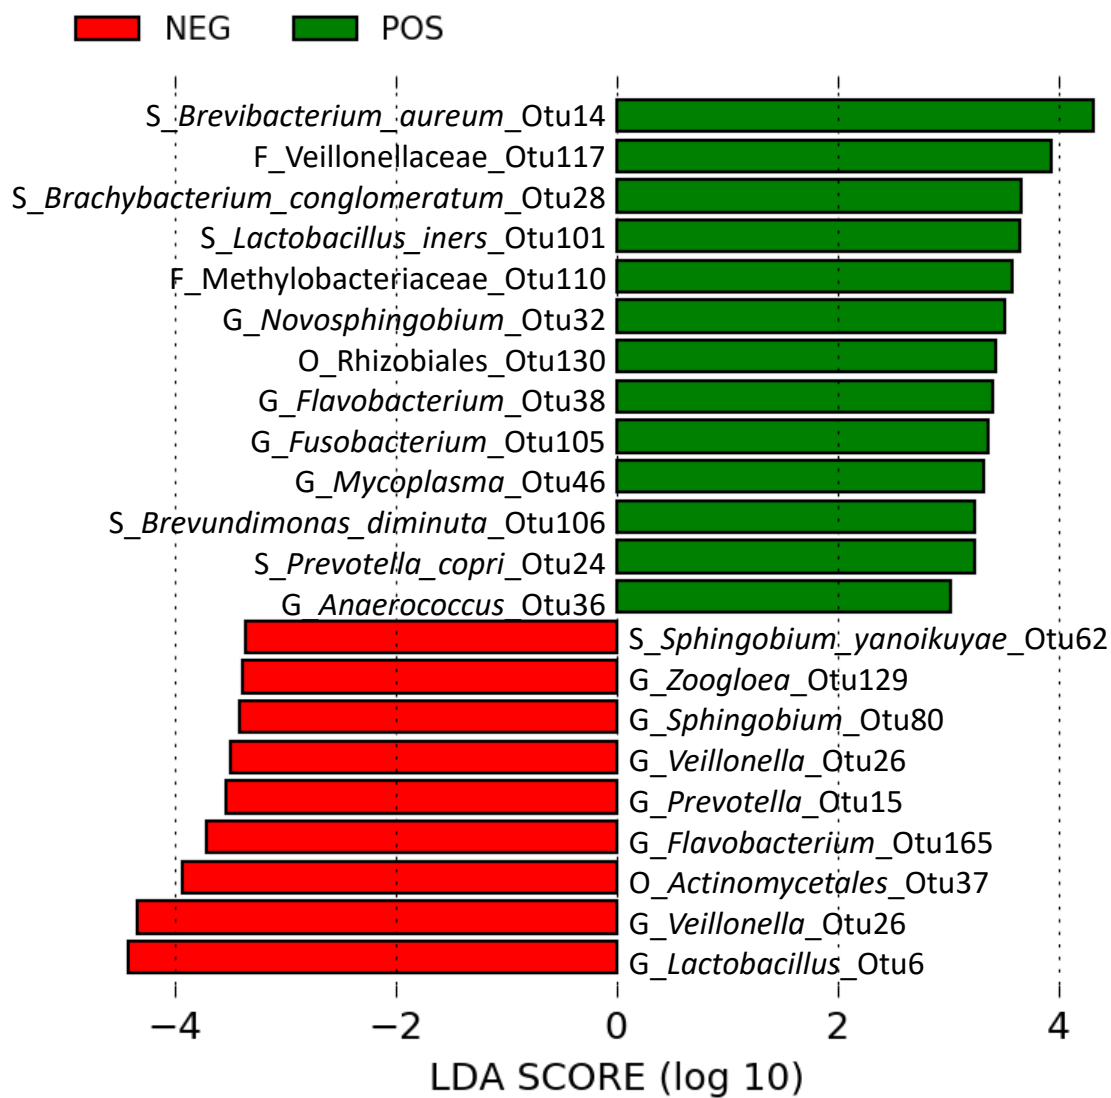

569

570 **FIGURE 3.** Differentially abundant taxa (OTU-level) in women with (green) or without (red) cervical SIL,  
571 identified by linear discriminant analysis (LDA). Only taxa meeting an LDA significant threshold >2 are  
572 shown (N=300; Lefse (39)).

573

574

575

576



577

## A INCREASED

*S\_Brevibacterium\_aureum*\_Otu14

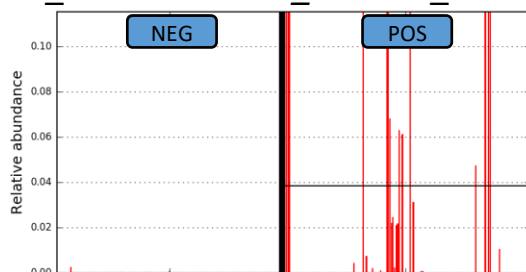

F\_Veillonellaceae\_Otu117

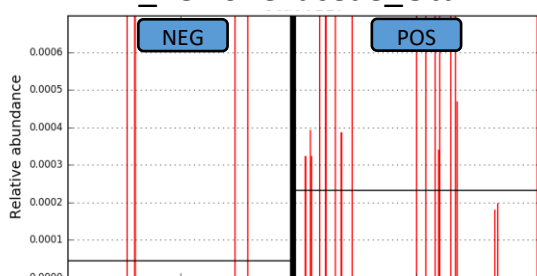

*S\_Brachyбактерium\_conglomeratum*\_Otu28

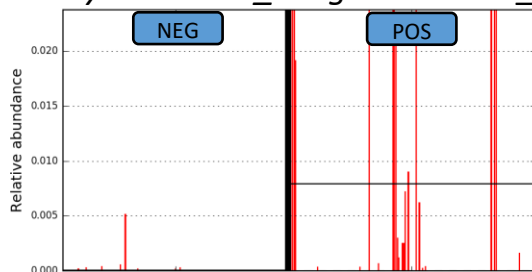

*S\_Lactobacillus\_iners*\_Otu101

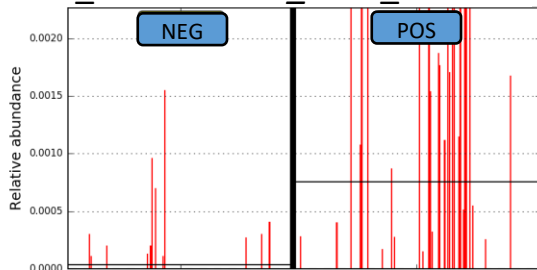

F\_Methylobacteriaceae\_Otu110

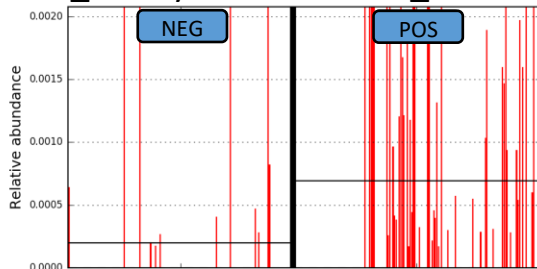

## B DECREASED

*S\_Sphingobium\_yanoikuyae*\_Otu62

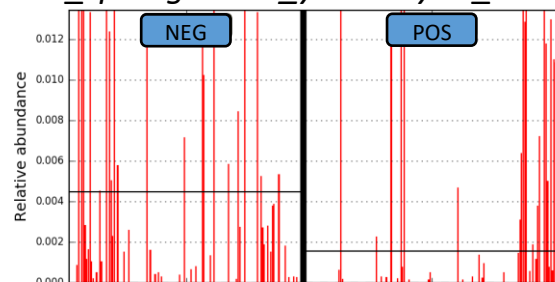

G\_Zoogloea\_Otu129

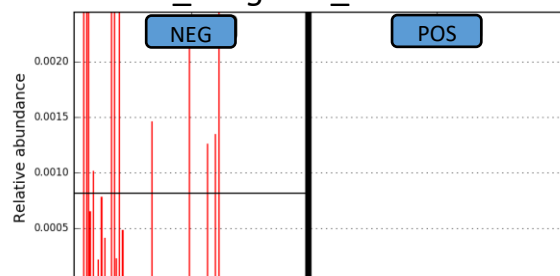

G\_Sphingobium\_Otu80

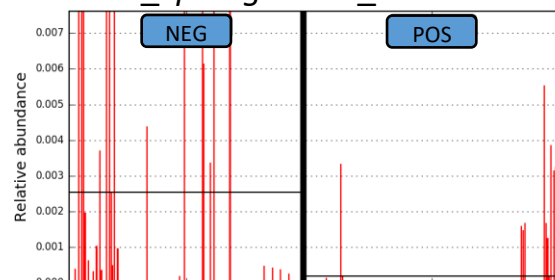

G\_Veillonella\_Otu26

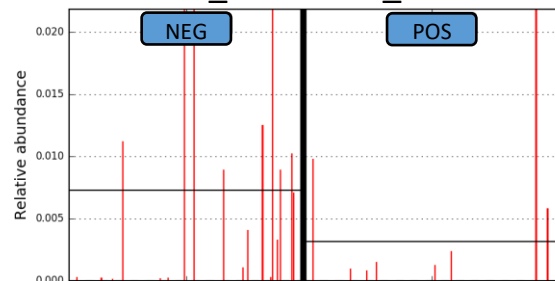

G\_Prevotella\_Otu15

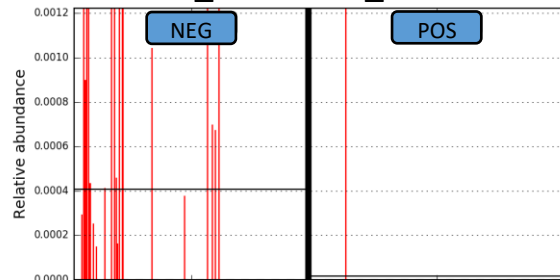

578

579 **FIGURE 4.** Histogram of most discriminant increased (A) or decreased (B) OTUs in women with (POS) and  
580 without (NEG) cervical SIL. Five features were chosen per category, based on effect size calculated by  
581 LDA (N=300; Lefse (39)). Red lines indicate relative abundance for each sample, and horizontal black line  
582 denotes median value.

583

584

585

586

587

588

589

590

591
